# Supplementary material for: Intrauterine Growth Restriction and Patent Ductus Arteriosus in Very and Extremely Preterm Infants: A Systematic Review and Meta-Analysis
Source: PubMed Central journal article supplement (PMC6376617; doi:10.3389/fendo.2019.00058), 2019-02-08
Supplement: Data_Sheet_1.pdf [file Data_Sheet_1.pdf]

## *Supplementary Material*

### **Intrauterine Growth Restriction and Patent Ductus Arteriosus in Very Preterm Infants: A Systematic Review and Meta-Analysis**

**Eduardo Villamor-Martinez<sup>1\*</sup>, Mohammed A. Kilani<sup>1\*</sup>, Pieter L. Degraeuwe<sup>1</sup>, Ronald I. Clyman<sup>2</sup>, Eduardo Villamor<sup>1#</sup>**

<sup>1</sup> Department of Pediatrics, Maastricht University Medical Center (MUMC+), School for Oncology and Developmental Biology (GROW), Maastricht, The Netherlands

<sup>2</sup> Cardiovascular Research Institute and Department of Pediatrics, University of California San Francisco, San Francisco, CA, USA

\*These authors contributed equally to this work.

**# Correspondence:**

Eduardo Villamor, MD PhD.

[e.villamor@mumc.nl](mailto:e.villamor@mumc.nl)

## 1 Supplementary Tables

**Supplementary Table 1:** Characteristics of all included studies.

| First author,<br>year | Country     | Study type# | Study<br>Perspective* | Prospective/<br>Retrospective | Infants (n) | Centers (n) | Mean or median<br>BW (g) | Mean or median<br>GA (weeks) | Definition<br>SGA/IUGR | Growth chart^                | Definition<br>of PDA& | PDA screening to<br>all infants | Timing of PDA<br>assessment |
|-----------------------|-------------|-------------|-----------------------|-------------------------------|-------------|-------------|--------------------------|------------------------------|------------------------|------------------------------|-----------------------|---------------------------------|-----------------------------|
| Aikio, 2014           | Finland     | Cohort      | PDA                   | Retro                         | 190         | 1           | 1251                     | 28.7                         | Unclear                | Population                   | hsPDA                 | Yes                             | day 2-5                     |
| Altman,<br>2011       | Sweden      | Cohort      | SGA/IUGR              | Prosp                         | 6674        | NA          | 2062                     | 33.1                         | <3 <sup>rd</sup> P     | US estimated<br>fetal weight | Treat                 | NA                              | NA                          |
| Amin, 1997            | Canada      | Ca-Co       | SGA/IUGR              | Retro                         | 186         | 1           | 936                      | 28.3                         | <3 <sup>rd</sup> P     | Population                   | hsPDA                 | NA                              | NA                          |
| Aoki, 2014            | Japan       | Cohort      | PDA                   | Prosp                         | 27          | 1           | 801                      | 26.3                         | Unclear                | Population                   | Treat                 | Yes                             | ≤7 days                     |
| Aucott,<br>2004       | USA         | Ca-Co       | SGA/IUGR              | Retro                         | 95          | 1           | 982                      | 28.4                         | <5 <sup>th</sup> P     | Population                   | Undef                 | NA                              | NA                          |
| Bardin,<br>1997       | Canada      | Cohort      | SGA/IUGR              | Prosp                         | 115         | 1           | N                        | N                            | <3 <sup>rd</sup> P     | Population                   | Treat                 | NA                              | NA                          |
| Bas-Suarez,<br>2014   | Spain       | Cohort      | PDA                   | Retro                         | 194         | 1           | 1008                     | 27.9                         | <10 <sup>th</sup> P    | Population                   | hsPDA                 | Yes                             | day 2-4                     |
| Bozzetti,<br>2013     | Italy       | Cohort      | SGA/IUGR              | Prosp                         | 310         | 1           | 1153                     | 29.7                         | <10 <sup>th</sup> P    | Population                   | hsPDA                 | NA                              | NA                          |
| Brooks,<br>2005       | Australia   | Cohort      | PDA                   | Prosp                         | 252         | 1           | 893                      | 26.0                         | <10 <sup>th</sup> P    | Population                   | hsPDA                 | Yes                             | NA                          |
| Brunner,<br>2013      | Austria     | Cohort      | PDA                   | Prosp                         | 322         | 1           | 1174                     | 28.5                         | <10 <sup>th</sup> P    | Population                   | Any PDA               | Yes                             | day 2-7                     |
| Claas, 2010           | Netherlands | Cohort      | SGA/IUGR              | Retro                         | 146         | 1           | 641                      | 30.                          | <10 <sup>th</sup> P    | Population                   | Treat                 | NA                              | NA                          |
| Cohen,<br>2017        | Netherlands | Ca-Co       | IUGR/SGA<br>and PDA   | Retro                         | 795         | 1           | 936                      | 28.7                         | <10 <sup>th</sup> P    | Population                   | hsPDA                 | No                              | ≤7 days                     |

| First author, year | Country     | Study type# | Study Perspective* | Prospective/ Retrospective | Infants (n) | Centers (n) | Mean or median BW (g) | Mean or median GA (weeks) | Definition SGA/IUGR    | Growth chart^ | Definition of PDA*& | PDA screening to all infants | Timing of PDA assessment |
|--------------------|-------------|-------------|--------------------|----------------------------|-------------|-------------|-----------------------|---------------------------|------------------------|---------------|---------------------|------------------------------|--------------------------|
| Cotton, 1981       | USA         | Cohort      | IUGR/SGA and PDA   | Prosp                      | 100         | 1           | NA                    | NA                        | Unclear                | Population    | hsPDA               | NA                           | NA                       |
| De Jesus, 2013     | USA         | Cohort      | SGA/IUGR           | Retro                      | 2971        | NA          | 730                   | 25.0                      | <10 <sup>th</sup> P    | Population    | Treat               | NA                           | NA                       |
| Dix, 2016          | Netherlands | Cohort      | PDA                | Prosp                      | 398         | 1           | 1312                  | 29.5                      | <10 <sup>th</sup> P    | Population    | hsPDA               | Yes                          | NA                       |
| Elimian, 1999      | USA         | Cohort      | SGA/IUGR           | Prosp                      | 1148        | 1           | NA                    | NA                        | <10 <sup>th</sup> P    | Customized    | Undef               | NA                           | NA                       |
| EL-Khuffash, 2008  | Ireland     | Cohort      | PDA                | Prosp                      | 80          | 1           | 1041                  | 28.3                      | Doppler                |               | hsPDA               | Yes                          | 12-48 h.                 |
| Engineer, 2010     | UK          | Cohort      | SGA/IUGR           | Retro                      | 121         | 1           | NA                    | NA                        | Doppler                | Fetal growth  | hsPDA               | No                           | NA                       |
| Garofoli, 2014     | Italy       | Cohort      | SGA/IUGR           | Retro                      | 76          | 1           | 1388                  | 31.7                      | Deviation fetal growth | Fetal growth  | Treat               | NA                           | NA                       |
| Giapros, 2012      | Greece      | Cohort      | SGA/IUGR           | Retro                      | 210         | 1           | 1136                  | 28.5                      | <10 <sup>th</sup> P    | Customized    | hsPDA               | No                           | NA                       |
| Girling, 1971      | UK          | Ca-Co       | PDA                | Retro                      | 85          | 1           | NA                    | NA                        | <10 <sup>th</sup> P    | Population    | Sign clinical PDA   | Yes                          | NA                       |
| Gortner, 1999      | Germany     | RCT         | SGA/IUGR           | Prosp                      | 317         | 6           | 1263                  | 29.6                      | <10 <sup>th</sup> P    | Population    | hsPDA               | NA                           | NA                       |
| Gortner, 2003      | Germany     | Ca-Co       | SGA/IUGR           | Prosp                      | 148         | 1           | 1748                  | 33.9                      | <10 <sup>th</sup> P    | Population    | hsPDA               | NA                           | NA                       |
| Griesmaier, 2013   | Austria     | Cohort      | PDA                | Prosp                      | 61          | 1           | NA                    | 30.1                      | Unclear                | Population    | Treat               | Yes                          | 48-72 h                  |

| First author, year  | Country       | Study type# | Study Perspective* | Prospective/ Retrospective | Infants (n) | Centers (n) | Mean or median BW (g) | Mean or median GA (weeks) | Definition SGA/IUGR    | Growth chart^ | Definition of PDA& | PDA screening to all infants | Timing of PDA assessment |
|---------------------|---------------|-------------|--------------------|----------------------------|-------------|-------------|-----------------------|---------------------------|------------------------|---------------|--------------------|------------------------------|--------------------------|
| Hartung, 2005       | Germany       | Ca-Co       | SGA/IUGR           | Retro                      | 88          | 1           | 1231                  | NA                        | Doppler                |               | Undef              | NA                           | NA                       |
| Isayama, 2015       | Japan, Canada | Cohort      | PDA                | Retro                      | 14888       | NA          | 1081                  | 28.5                      | <10 <sup>th</sup> P    | Population    | Treat              | No                           | NA                       |
| Janz-Robinson, 2015 | Australia     | Cohort      | PDA                | Retro                      | 1473        | 10          | 944                   | 26.5                      | <10 <sup>th</sup> P    | Population    | Treat              | No                           | NA                       |
| Koch, 2006          | USA           | Cohort      | PDA                | Prosp                      | 122         | 1           | 794                   | 26.1                      | Unclear                | Population    | Any PDA            | Yes                          | day 3-10                 |
| Lee A, 2015         | South Korea   | Cohort      | PDA                | Prosp                      | 2254        | 55          | 1069                  | 28.3                      | Unclear                | Population    | Treat              | Yes                          | NA                       |
| Lee M, 2001         | USA           | Ca-Co       | SGA/IUGR           | Retro                      | 110         | 1           | 1005                  | 27.6                      | <3 <sup>rd</sup> P     | Population    | Undef              | Yes                          | NA                       |
| Lokku, 2016         | Canada        | Cohort      | PDA                | Retro                      | 5824        | 30          | NA                    | 26.9                      | <10 <sup>th</sup> P    | Population    | Treat              | NA                           | NA                       |
| Mannarino, 2010     | Italy         | Cohort      | PDA                | Prosp                      | 36          | 1           | 1338                  | 30.8                      | Doppler                | Fetal growth  | hsPDA              | Yes                          | NA                       |
| Mirea, 2012         | Canada        | Cohort      | PDA                | Retro                      | 3556        | 22          | NA                    | 26.9                      | Unclear                | Population    | Treat              | NA                           | NA                       |
| Oliveria, 2016      | Portugal      | Cohort      | PDA                | Retro                      | 328         | 1           | 1231                  | 30.09                     | <10 <sup>th</sup> P    | Population    | hsPDA              | Yes                          | 24-72 h                  |
| Rakza, 2007         | France        | Cohort      | IUGR/SGA and PDA   | Prosp                      | 48          | 1           | 1126                  | 29.1                      | Deviation fetal growth | Fetal growth  | hsPDA              | NA                           | day 1-7                  |
| Ree, 2014           | Netherlands   | Ca-Co       | SGA/IUGR           | Retro                      | 950         | 1           | 1865                  | 33.3                      | <10 <sup>th</sup> P    | Population    | Treat              | NA                           | NA                       |
| Reiss, 2003         | Germany       | Cohort      | PDA                | Prosp                      | 1195        | 999         | 1196                  | 28.8                      | <10 <sup>th</sup> P    | Population    | hsPDA              | NA                           | NA                       |
| Rijken, 2007a       | Netherlands   | Cohort      | SGA/IUGR           | Prosp                      | 158         | 1           | 1290                  | 29.5                      | <10 <sup>th</sup> P    | Population    | Undef              | NA                           | NA                       |

| First author, year  | Country     | Study type# | Study Perspective* | Prospective/ Retrospective | Infants (n) | Centers (n) | Mean or median BW (g) | Mean or median GA (weeks) | Definition SGA/IUGR | Growth chart^ | Definition of PDA* | PDA screening to all infants | Timing of PDA assessment |
|---------------------|-------------|-------------|--------------------|----------------------------|-------------|-------------|-----------------------|---------------------------|---------------------|---------------|--------------------|------------------------------|--------------------------|
| Robel-Tilling, 2003 | Germany     | Ca-Co       | PDA                | Prosp                      | 81          | 1           | 1768                  | 32.8                      | Doppler             |               | Undef              | NA                           | day 1-5                  |
| Sellmer, 2013       | Denmark     | Cohort      | PDA                | Prosp                      | 183         | 1           | 922                   | 27.0                      | <3 <sup>rd</sup> P  | Population    | hsPDA              | Yes                          | day 3                    |
| Shah, 2011          | USA         | Cohort      | PDA                | Prosp                      | 497         | 1           | 983                   | 30.75                     | <10 <sup>th</sup> P | Customized    | Any PDA            | Yes                          | day 3                    |
| Soudee, 2014        | France      | Ca-Co       | SGA/IUGR           | Retro                      | 146         | 1           | 1068                  | 30.0                      | <3 <sup>rd</sup> P  | Customized    | Treat              | NA                           | NA                       |
| Tsai, 2015          | Taiwan      | Cohort      | PDA                | Retro                      | 1680        | 21          | 1052                  | 28.3                      | <10 <sup>th</sup> P | Population    | Undef              | NA                           | NA                       |
| Van de Bor, 1988    | Netherlands | Cohort      | PDA                | Prosp                      | 1252        | 8           | 1270                  | 30.5                      | <10 <sup>th</sup> P | Customized    | hsPDA              | No                           | NA                       |
| Westby Wold, 2016   | Norway      | Cohort      | SGA/IUGR           | Retro                      | 365         | 15          | 833                   | 26.0                      | <5 <sup>th</sup> P  | Population    | Treat              | NA                           | NA                       |
| Xydis, 2016         | Greece      | Cohort      | SGA/IUGR           | Prosp                      | 205         | 1           | 1792                  | 32.9                      | <10 <sup>th</sup> P | Customized    | hsPDA              | NA                           | NA                       |
| Yu, 2011            | South Korea | Cohort      | SGA/IUGR           | Retro                      | 415         | 1           | 768                   | 26.2                      | <10 <sup>th</sup> P | Population    | Treat              | No                           | NA                       |

SGA: small for gestational age; IUGR: intrauterine growth restriction; PDA: patent ductus arteriosus; BW: birth weight; GA: gestational age; NA: information not available.

#Abbreviations for study design: Ca-Co: case-control study; RCT: randomized control trial.

\*Abbreviations for study perspective: PDA: study analyzed SGA/IUGR as a risk factor for PDA; SGA/IUGR: study analyzed PDA as an outcome of SGA/IUGR; IUGR/SGA and PDA: study analyzed the association between SGA/IUGR and PDA as their primary outcome.

^Abbreviations for growth chart: Population: population-based growth chart

&Abbreviations for definition of PDA: hsPDA: hemodynamically significant PDA; Treat: PDA requiring treatment (pharmacological or surgical);  
Undef: undefined.

**Supplementary Table 2.** Details of Newcastle-Ottawa Quality assessment.

| Firsty author, year | Selection | Comparability | Outcome /Exposure | Total | Reason for downgrade                              |
|---------------------|-----------|---------------|-------------------|-------|---------------------------------------------------|
| Aikio, 2014         | 3         | 0             | 3                 | 6     | Unclear definition SGA, No adjustment             |
| Altman, 2011        | 4         | 0             | 3                 | 7     | No adjustment                                     |
| Amin, 1997          | 4         | 2             | 2                 | 8     | Unclear definition PDA                            |
| Aoki, 2014          | 3         | 0             | 3                 | 6     | Unclear definition SGA, No adjustment             |
| Aucott, 2004        | 4         | 2             | 2                 | 8     | Unclear definition PDA                            |
| Bardin, 1997        | 4         | 0             | 3                 | 7     | No adjustment                                     |
| Bas-Suarez, 2014    | 4         | 0             | 3                 | 7     | No adjustment                                     |
| Bozzetti, 2013      | 4         | 1             | 3                 | 8     | No adjustment                                     |
| Brooks, 2005        | 4         | 0             | 3                 | 7     | No adjustment                                     |
| Brunner, 2013       | 4         | 0             | 3                 | 7     | No adjustment                                     |
| Claas, 2010         | 4         | 0             | 3                 | 7     | No adjustment                                     |
| Cohen, 2017         | 4         | 0             | 3                 | 7     | Did not match for GA                              |
| Cotton, 1981        | 3         | 0             | 3                 | 6     | Unclear definition SGA, No adjustment             |
| De, Jesus, 2013     | 4         | 1             | 3                 | 8     | No adjustment                                     |
| Dix, 2016           | 4         | 0             | 3                 | 7     | No adjustment                                     |
| Elimian, 1999       | 4         | 0             | 2                 | 6     | No adjustment, Unclear definition PDA             |
| EL-Khuffash, 2008   | 4         | 0             | 3                 | 7     | No adjustment                                     |
| Engineer, 2010      | 4         | 0             | 3                 | 7     | No adjustment                                     |
| Garofoli, 2014      | 3         | 0             | 3                 | 6     | Unclear definition SGA, No adjustment             |
| Giapros, 2012       | 4         | 1             | 3                 | 8     | No adjustment                                     |
| Girling, 1971       | 4         | 0             | 3                 | 7     | No adjustment                                     |
| Gortner, 1999       | 4         | 0             | 3                 | 7     | No adjustment                                     |
| Gortner, 2003       | 4         | 1             | 3                 | 8     | Only matched for 1 factor                         |
| Griesmaier, 2013    | 3         | 0             | 3                 | 6     | No adjustment, Unclear definition SGA             |
| Hartung, 2005       | 4         | 1             | 2                 | 7     | Only matched for 1 factor, Unclear definition PDA |
| Isayama, 2015       | 4         | 0             | 3                 | 7     | No adjustment                                     |
| Janz-Robinson, 2015 | 4         | 0             | 3                 | 7     | No adjustment                                     |
| Koch, 2006          | 3         | 0             | 3                 | 6     | Unclear definition SGA, No adjustment             |
| Lee, A, 2015        | 3         | 0             | 3                 | 6     | Unclear definition SGA, No adjustment             |
| Lee, M, 2001        | 4         | 2             | 2                 | 8     | Unclear definition PDA                            |

|                     |   |   |   |   |                                       |
|---------------------|---|---|---|---|---------------------------------------|
| Lokku, 2016         | 4 | 0 | 3 | 7 | No adjustment                         |
| Mannarino, 2010     | 3 | 0 | 3 | 6 | Unclear definition SGA, No adjustment |
| Mirea, 2012         | 3 | 0 | 3 | 6 | Unclear definition SGA, No adjustment |
| Oliveria, 2016      | 4 | 0 | 3 | 7 | No adjustment                         |
| Rakza, 2007         | 4 | 0 | 3 | 7 | No adjustment                         |
| Ree, 2014           | 4 | 1 | 3 | 8 | Only matched for 1 factor             |
| Reiss, 2003         | 4 | 1 | 3 | 8 | No adjustment                         |
| Rijken, 2007        | 4 | 0 | 2 | 6 | No adjustment, Unclear definition PDA |
| Robel-Tilling, 2003 | 4 | 0 | 2 | 6 | No adjustment, Unclear definition PDA |
| Sellmer, 2013       | 4 | 0 | 3 | 7 | No adjustment                         |
| Shah, 2011          | 4 | 0 | 3 | 7 | No adjustment                         |
| Soudee, 2014        | 4 | 1 | 3 | 8 | Only matched for 1 factor             |
| Tsai, 2015          | 4 | 1 | 2 | 7 | Only matched for 1 factor             |
| Van, de, Bor, 1988  | 4 | 0 | 3 | 7 | No adjustment                         |
| Westby, Wold, 2016  | 4 | 1 | 3 | 8 | No adjustment                         |
| Xydis, 2016         | 4 | 0 | 3 | 7 | No adjustment                         |
| Yu, 2011            | 4 | 0 | 3 | 7 | No adjustment                         |

Studies were evaluated as though the association between growth restriction and PDA was the primary outcome.

SGA: small for gestational age; PDA: patent ductus arteriosus.



## 2 Supplementary Figures

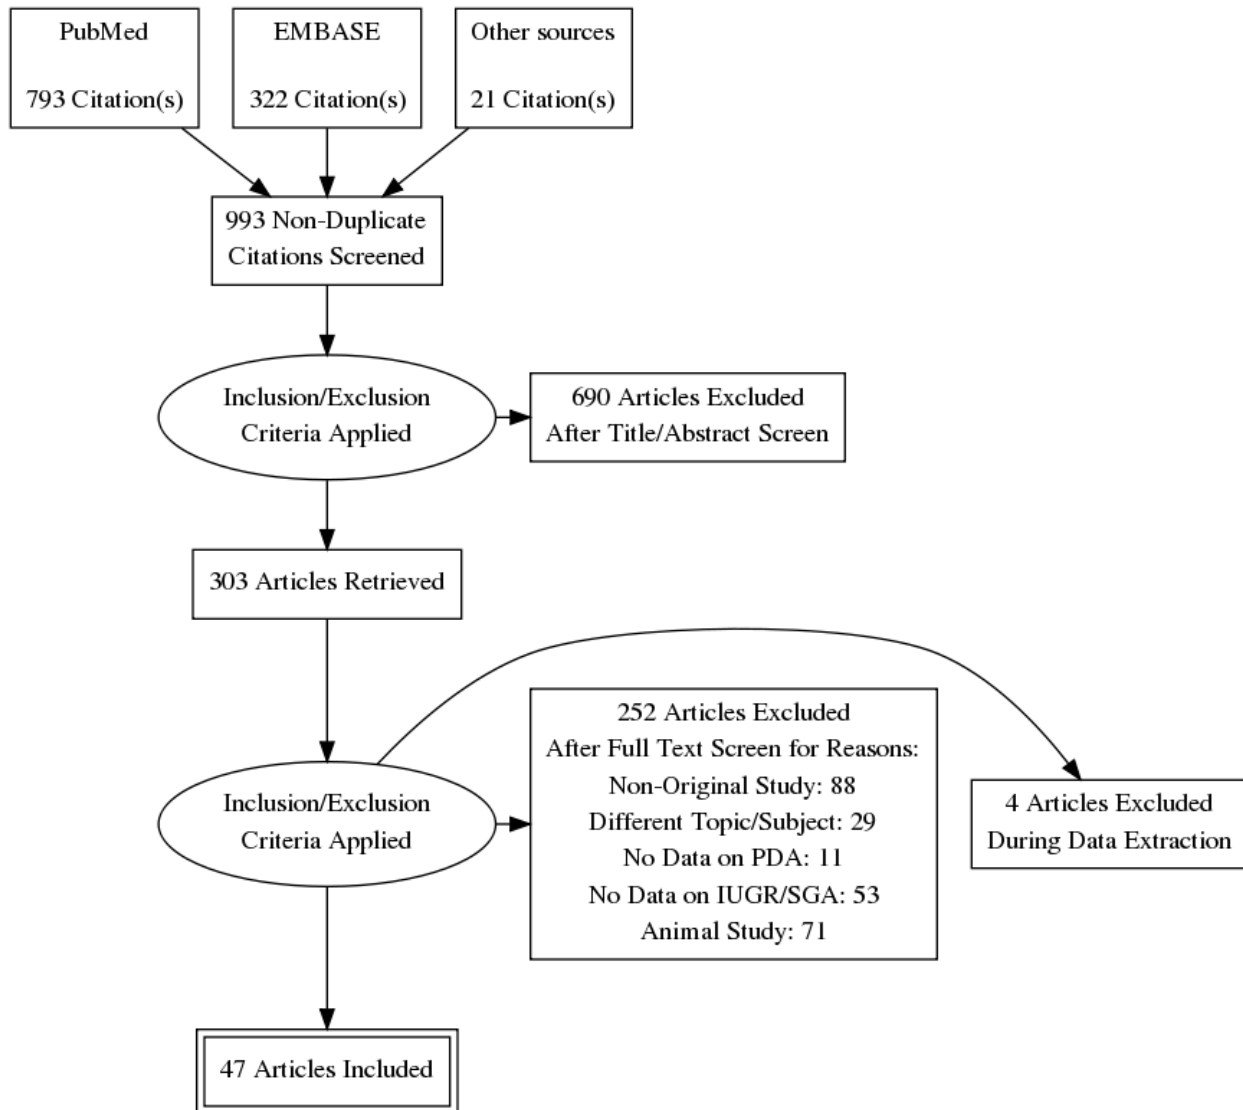

**Supplementary Figure 1.** PRISMA search diagram of included and excluded studies. PDA: patent ductus arteriosus; SGA: small for gestational age; IUGR: intrauterine growth restriction.

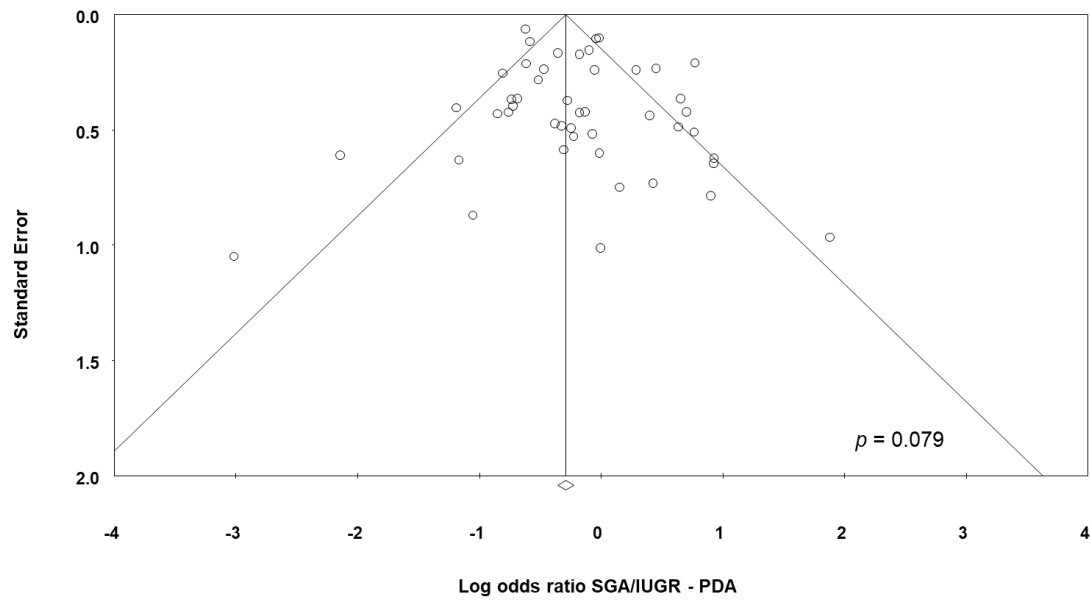

**Supplementary Figure 2.** Funnel plot for publication bias. SGA: small for gestational age; IUGR: intrauterine growth restriction; PDA: patent ductus arteriosus.

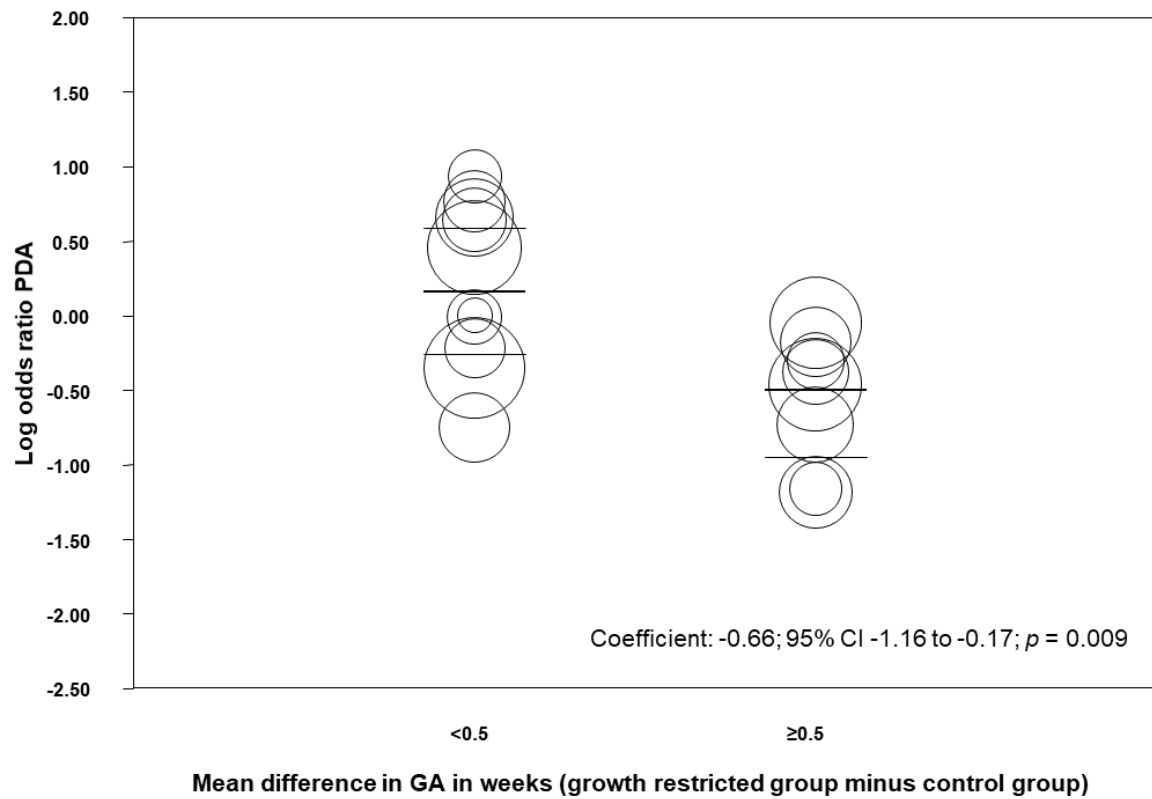

**Supplementary Figure 3.** Meta-regression comparing studies with a mean difference in gestational age (GA) between groups of < 0.5 weeks vs. studies with a MD in GA of  $\geq 0.5$  weeks. PDA: patent ductus arteriosus; CI: confidence interval.

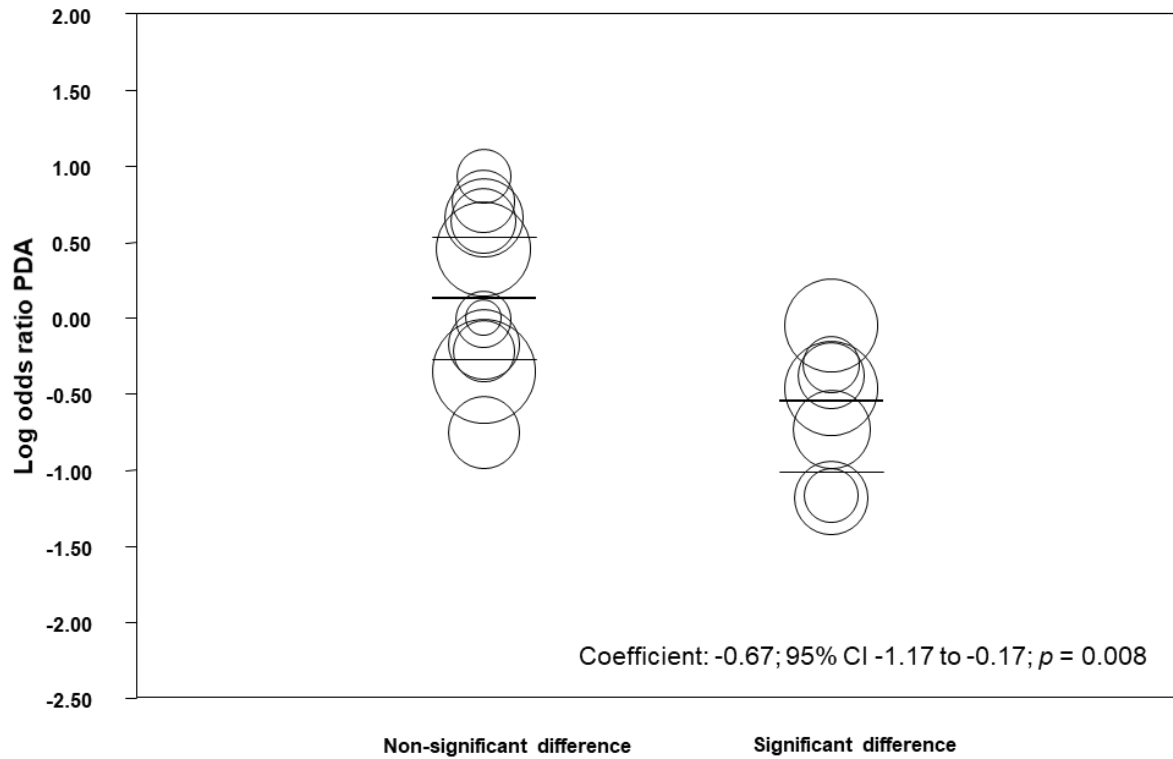

**Supplementary Figure 4.** Meta-regression comparing studies with a mean difference in gestational age between groups which was non-significant ( $p \geq 0.05$ ) vs. studies where it was significant ( $p < 0.05$ ). PDA: patent ductus arteriosus; CI: confidence interval.

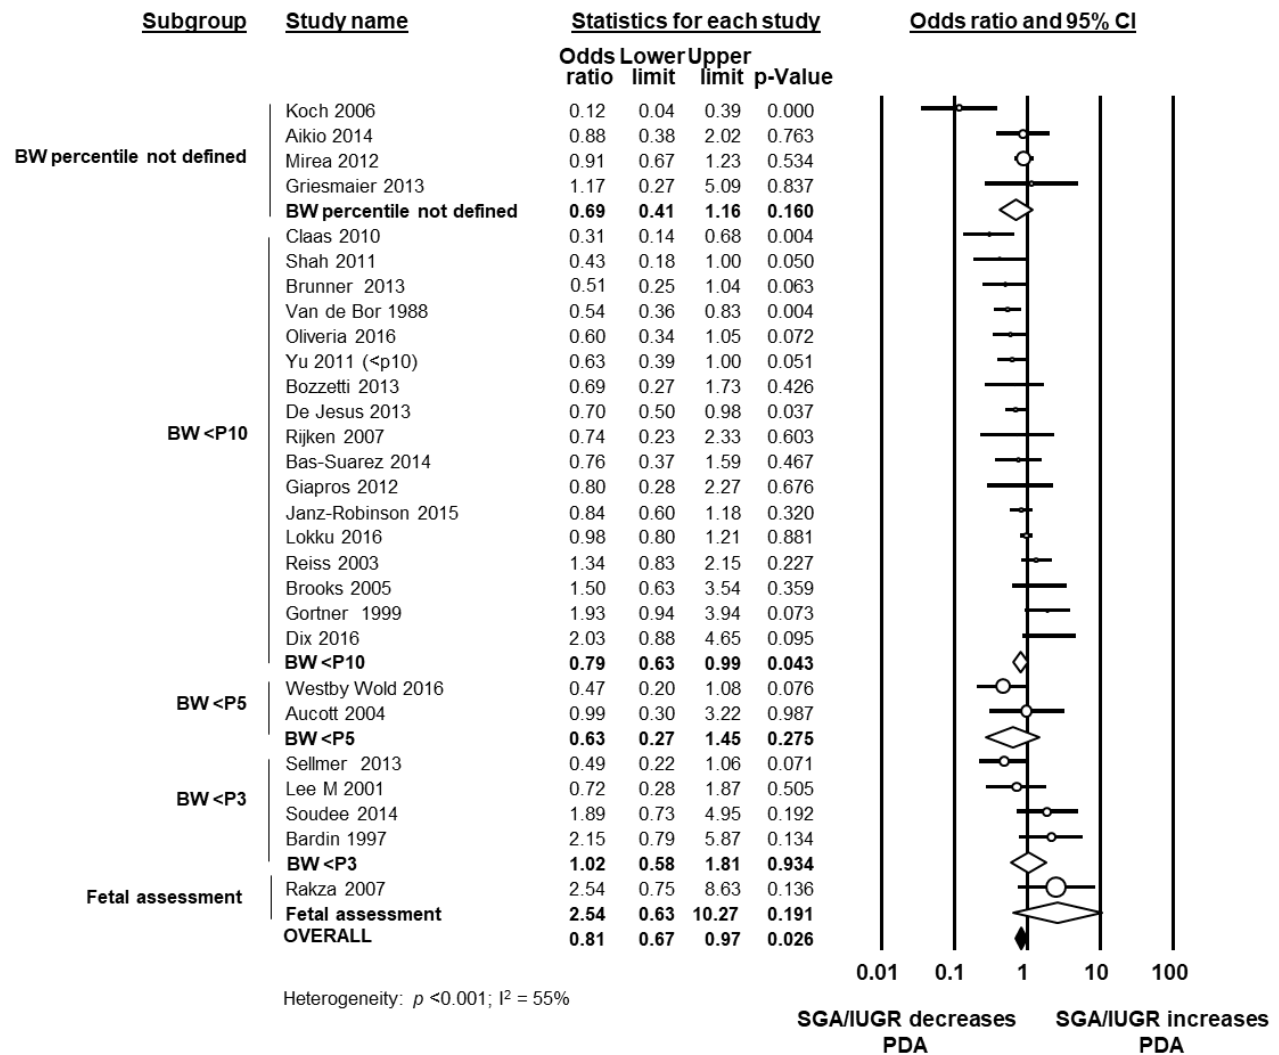

**Supplementary Figure 5.** Subgroup meta-analysis on the association between growth restriction and patent ductus arteriosus (PDA) of studies which only included infants with gestational age <28 weeks or birth weight (BW) <1000g. CI: confidence interval; SGA: small for gestational age; IUGR: intrauterine growth restriction; <P10: BW lower than 10<sup>th</sup> percentile; <P5: BW lower than 5<sup>th</sup> percentile; <P3: BW lower than 3<sup>rd</sup> percentile.

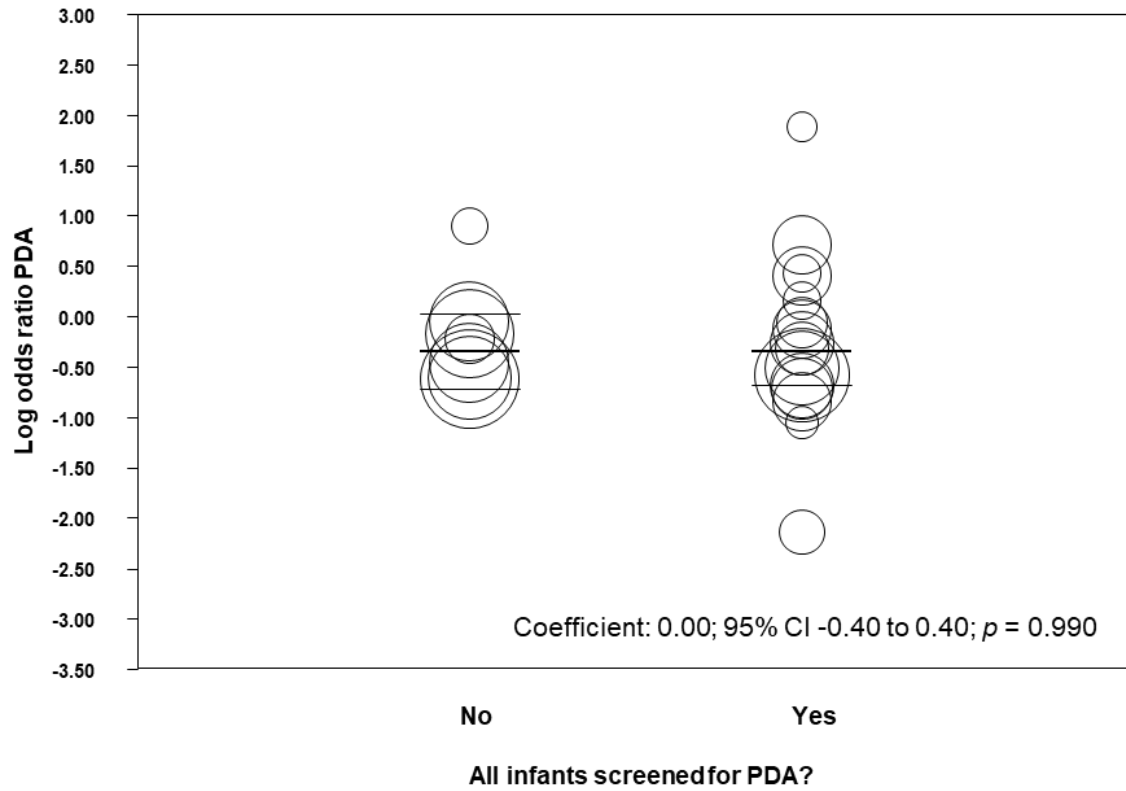

**Supplementary Figure 6.** Meta-regression comparing studies which screened all infants for PDA vs. studies which only assessed PDA in selected infants. PDA: patent ductus arteriosus; CI: confidence interval.

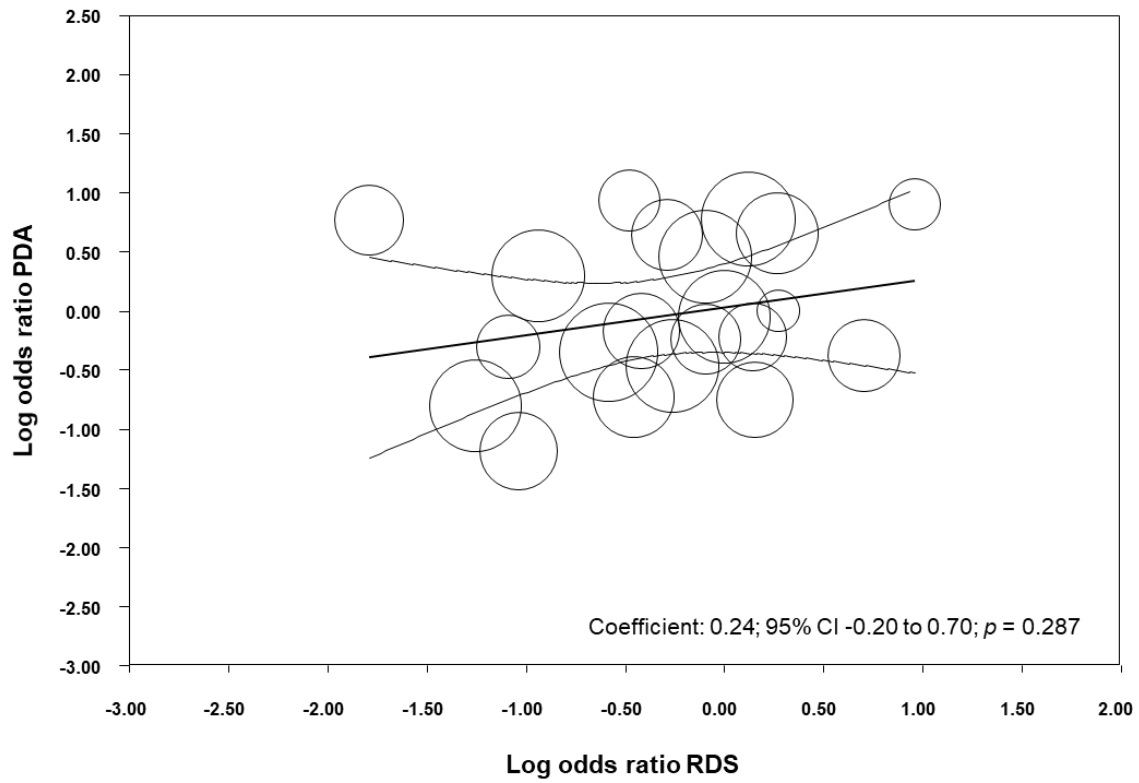

**Supplementary Figure 7.** Meta-regression of risk of patent ductus arteriosus (PDA) in the growth restricted group and risk of respiratory distress syndrome (RDS). CI: confidence interval.
